# Supplementary material for: Molecular Docking Studies on Methanolic Propolis Extracts Collected from Different Regions in Saudi Arabia as a Potential Inhibitor of Topoisomerase IIβ
Source: MDPI journal article supplement (doi:10.3390/separations9120392), 2022-11-24
Supplement: s1 [file s1]

Table S1: the GC mass of propolis extracts

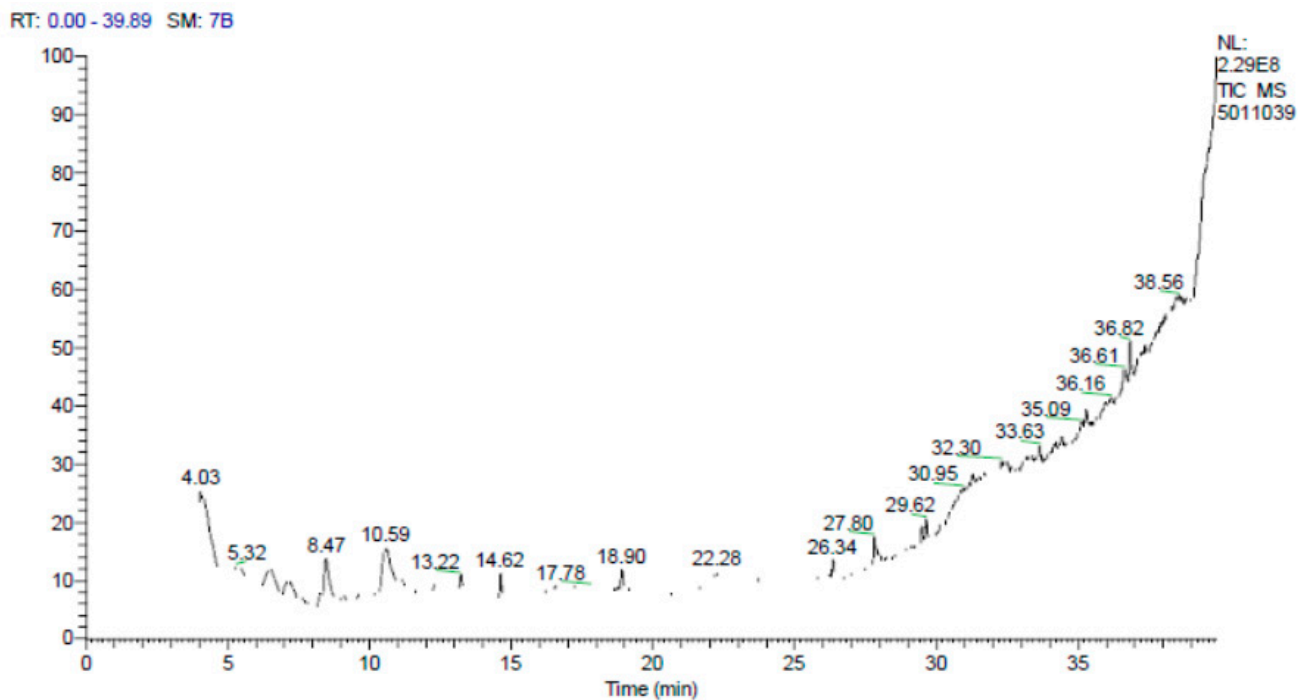

| R.t   | Compound name                                                            | Percentage % | Molecular weight | Molecular formula                                              |
|-------|--------------------------------------------------------------------------|--------------|------------------|----------------------------------------------------------------|
| 4.06  | D-Fructose, diethyl mercaptal, pentaacetate                              | 13.66        | 496              | C <sub>20</sub> H <sub>32</sub> O <sub>10</sub> S <sub>2</sub> |
| 6.51  | 2,4:3,5-Dimethylene-l-iditol                                             | 13.01        | 214              | C <sub>13</sub> H <sub>26</sub> O <sub>2</sub>                 |
| 7.10  | 1-(Cyclopropyl-nitro-methyl)-cyclopentanol                               | 7.90         | 158              | C <sub>8</sub> H <sub>14</sub> O <sub>3</sub>                  |
| 8.46  | Pentanoic acid, 2-acetyl-4-methyl-, ethyl ester                          | 10.13        | 186              | C <sub>10</sub> H <sub>18</sub> O <sub>3</sub>                 |
| 10.52 | 2(3H)-Furanone, 5-heptyldihydro-                                         | 8.67         | 184              | C <sub>11</sub> H <sub>20</sub> O <sub>2</sub>                 |
| 10.58 | Melezitose                                                               | 6.40         | 504              | C <sub>18</sub> H <sub>32</sub> O <sub>16</sub>                |
| 13.22 | α-D-Glucopyranose,4-O-α-D-galactopyranosyl-                              | 2.26         | 342              | C <sub>12</sub> H <sub>22</sub> O <sub>11</sub>                |
| 14.62 | Undecanoic acid, 11-amino-                                               | 4.18         | 201              | C <sub>11</sub> H <sub>23</sub> NO <sub>2</sub>                |
| 18.90 | 6,9-Octadecadiynoic acid, methyl ester                                   | 3.72         | 290              | C <sub>19</sub> H <sub>30</sub> O <sub>2</sub>                 |
| 26.34 | 16-Octadecenoic acid, methyl ester                                       | 3.71         | 296              | C <sub>19</sub> H <sub>36</sub> O <sub>2</sub>                 |
| 27.80 | Linoleic acid ethyl ester                                                | 5.00         | 308              | C <sub>20</sub> H <sub>36</sub> O <sub>2</sub>                 |
| 29.48 | 9,12-Octadecadienoic acid (Z,Z)-, 2-hydroxy-1-(hydroxymethyl)ethyl ester | 6.29         | 354              | C <sub>21</sub> H <sub>38</sub> O <sub>4</sub>                 |
| 35.28 | Betulin                                                                  | 8.04         | 442              | C <sub>30</sub> H <sub>50</sub> O <sub>2</sub>                 |
| 36.82 | Trilinolein                                                              | 6.91         | 878              | C <sub>57</sub> H <sub>98</sub> O <sub>6</sub>                 |
